# Supplementary material
Source: Springer Nature journal article supplement (https://www.springermedizin.de/resource/supplementary/12931_2013_1385_MOESM3_ESM.pdf/9426136)

**A**

Phase contrast

RGB merge

Control

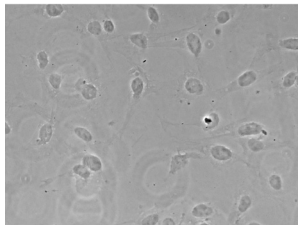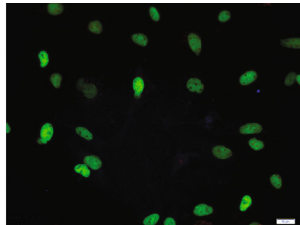

PDGF-A

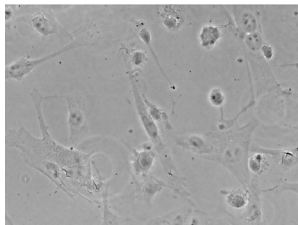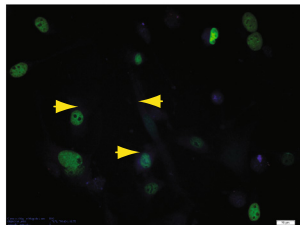**B**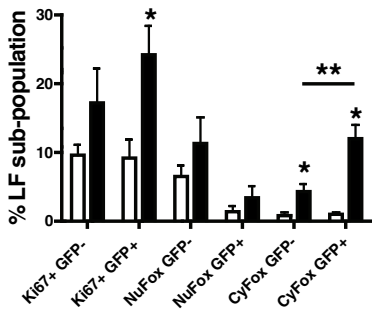

Supplement: MOESM3 [file 9426136]
